# Supplementary material for: Facile assembly of an affordable miniature multicolor fluorescence microscope made of 3D-printed parts enables detection of single cells
Source: PubMed Central journal article supplement (PMC6786622; doi:10.1371/journal.pone.0215114), 2019-10-10
Supplement: pone.0215114.s001.pdf [file pone.0215114.s001.pdf]

| Description                                  | Manufacturer      | PN                     | QTY | Cost each (USD) | Total        |
|----------------------------------------------|-------------------|------------------------|-----|-----------------|--------------|
| <b>Mechanical assembly</b>                   |                   |                        |     |                 |              |
| 3D printed parts (10 pieces, ≈ 35 gr. PLA) * |                   |                        |     | 2.5             | 2.5          |
| <b>Sub-total Mechanical</b>                  |                   |                        |     |                 | <b>2.5</b>   |
| <b>Electronic components</b>                 |                   |                        |     |                 |              |
| 4N25 Optocoupler                             | On Semiconductor  | 4N25SM                 | 3   | \$0.60          | 1.8          |
| BJT TIP-41                                   | On Semiconductor  | MJB41CG                | 3   | \$1.44          | 4.32         |
| Voltage regulator LM317                      | Texas Instruments | LM317DCYR              | 3   | \$0.95          | 2.85         |
| 3 mm White LED                               | Lumex             | SLX-LX3054UWC          | 1   | \$0.70          | 0.7          |
| UV SMD LED, 385 nm                           | Vishay            | VLMU3500-385-120       | 1   | \$11.46         | 11.46        |
| High power Green LED, 535 nm                 | Multicomp         | OSW-4334               | 1   | \$10.78         | 10.78        |
| High power Blue LED, 475 nm                  | Multicomp         | OSW-6303               | 1   | \$11.68         | 11.68        |
| 100 Ω SMD resistor                           | Yageo             | RC0402JR-13100RL       | 3   | \$0.02          | 0.06         |
| 1 kΩ SMD resistor                            | Yageo             | RC0402JR-131KL         | 3   | \$0.02          | 0.06         |
| 10 kΩ SMD resistor                           | Yageo             | RC0402FR-1310KL        | 6   | \$0.02          | 0.12         |
| 2.2 Ω SMD resistor                           | Bourns            | CRM2512-JW-2R2ELF      | 1   | \$0.19          | 0.19         |
| 3.3 Ω SMD resistor, 2512                     | Bourns            | CRS2512-FW-3R30ELF     | 3   | \$0.44          | 1.32         |
| Male pin header (40 pins)                    | MCM               | PH1-40-UA              | 1   | \$0.47          | 0.47         |
| FR-4 plain copper board*                     | Mextronics        | TGN-16                 | 1   | \$0.42          | 0.42         |
| <b>Sub-total Electronics</b>                 |                   |                        |     |                 | <b>46.23</b> |
| <b>Electrical</b>                            |                   |                        |     |                 |              |
| Power supply charger 3.4 V - 12 V, 500 mA    | Steren            | ELI-055                | 1   | 9               | 9            |
| <b>Sub-total Electrical</b>                  |                   |                        |     |                 | <b>9</b>     |
| <b>Optical</b>                               |                   |                        |     |                 |              |
| UV filter (High-pass)                        | Roscolux          | #3114 - THOUGH UV      | 1   | 0.19            | 0.19         |
| Green Wratten filter (Band-pass)             | Kodak             | #58 Wratten filter     | 1   | 0.12            | 0.12         |
| Red Filter (High-pass)                       | Roscolux          | #19 - FIRE             | 1   | 0.19            | 0.19         |
| CMOS Camera 8 Mpx                            | Raspberry Pi      | RPI 8MP CAMERA BOARD   | 1   | 26.44           | 26.44        |
| <b>Sub-total Optical</b>                     |                   |                        |     |                 | <b>26.94</b> |
| <b>Computer system</b>                       |                   |                        |     |                 |              |
| Single board computer                        | Raspberry Pi      | Raspberry Pi 2 Model B | 1   | 40              | 40           |
| 7" Touchscreen Display                       | Raspberry Pi      | Touch display          | 1   | 78              | 78           |
| <b>Sub-total Computing</b>                   |                   |                        |     |                 | <b>118</b>   |
| <b>Total</b>                                 |                   |                        |     |                 | <b>202.7</b> |
